1       **The development and validation of a prognostic model to predict relapse in**  
2       **adults with remitted depression in primary care: secondary analysis of pooled**  
3       **individual participant data from multiple studies**  
4

5       Andrew S Moriarty<sup>\*1 2 3</sup>, Lewis W Paton<sup>1 2</sup>, Kym IE Snell<sup>4,5</sup>, Lucinda Archer<sup>4,5</sup>,  
6       Richard D Riley<sup>4,5</sup>, Joshua EJ Buckman<sup>6 7</sup>, Carolyn A Chew-Graham<sup>3</sup>, Simon  
7       Gilbody<sup>1 2</sup>, Shehzad Ali<sup>2 8</sup>, Stephen Pilling<sup>6</sup>, Nick Meader<sup>9</sup>, Bob Phillips<sup>1 10</sup>, Peter A  
8       Coventry<sup>2</sup>, Jaime Delgadoillo<sup>11</sup>, David A Richards<sup>12 13</sup>, Chris Salisbury<sup>14</sup>, Dean  
9       McMillan<sup>1 2</sup>

10

- 11       1. Hull York Medical School, University of York  
12       2. Department of Health Sciences, University of York  
13       3. School of Medicine, Keele University, Keele, UK  
14       4. Institute of Applied Health Research, University of Birmingham, UK  
15       5. National Institute for Health and Care Research (NIHR) Birmingham Biomedical  
16       Research Centre, UK  
17       6. CORE Data Lab, Research Department of Clinical, Educational & Health Psychology,  
18       University College London, London, UK.  
19       7. iCope - Camden & Islington NHS Talking Therapies for anxiety and depression  
20       services - Camden & Islington NHS Foundation Trust, London, UK  
21       8. Department of Epidemiology and Biostatistics, Schulich School of Medicine &  
22       Dentistry, Western University, London, ON, Canada  
23       9. Newcastle University, UK  
24       10. Centre for Reviews and Dissemination, University of York, UK  
25       11. Department of Psychology, University of Sheffield, UK  
26       12. Faculty of Health and Life Sciences, University of Exeter, UK  
27       13. Department of Health and Caring Sciences, Western Norway University of Applied  
28       Sciences, Inndalsveien 28, 5063 Bergen, Norway  
29       14. Centre for Academic Primary Care, University of Bristol, UK

30 **What is already known on this topic**

31 Relapse contributes to the morbidity and burden associated with depression and,  
32 while there is robust research confirming predictors of relapse, individualised risk  
33 prediction is a challenge.

34

35 **What this study adds**

36 We found that it is not possible to accurately predict individualised risk of relapse  
37 using prognostic factors that are routinely collected and available in primary care.  
38 We found evidence to suggest that relationship status (not being in a relationship) is  
39 associated with increased risk of relapse and warrants confirmatory prognostic factor  
40 research.

41

42 **How this study might affect research, practice or policy**

43 Future prognosis research in this area should focus on exploring the feasibility of  
44 routinely measuring and documenting additional prognostic factors in primary care  
45 (for example, adverse childhood events, relationship status and social support) and  
46 including these in prognostic models. Until we can more accurately identify  
47 individuals at increased risk of relapse, commonly used acute-phase treatments  
48 could be optimised to better prepare for and mitigate the risk of relapse and there is  
49 a need for brief, scalable relapse prevention interventions that could be provided  
50 more widely.

51

52 **Key words:** Relapse; Recurrence; Depression; Prognosis

53 **ABSTRACT**

54

55 **Background**

56 Relapse of depression is common and contributes to the overall associated morbidity  
57 and burden. We lack evidence-based tools to estimate an individual's risk of relapse  
58 after treatment in primary care, which may help us more effectively target relapse  
59 prevention.

60

61 **Objective**

62 Develop and validate a prognostic model to predict risk of relapse of depression in  
63 primary care.

64

65 **Methods**

66 Multilevel logistic regression models were developed, using individual participant  
67 data from seven primary care-based studies (n=1244), to predict relapse of  
68 depression. The model was internally validated using bootstrapping and  
69 generalisability was explored using internal-external cross-validation.

70

71 **Findings**

72 Residual depressive symptoms [Odds ratio (OR): 1.13 (95% CI: 1.07-1.20),  $p < 0.001$ ]  
73 and baseline depression severity [OR: 1.07 (1.04-1.11),  $p < 0.001$ ] were associated  
74 with relapse. The validated model had low discrimination [C-statistic 0.60 (0.55-  
75 0.65)] and miscalibration concerns [calibration slope 0.81 (0.31-1.31)]. On secondary  
76 analysis, being in a relationship was associated with reduced risk of relapse [OR:  
77 0.43 (0.28-0.67),  $p < 0.001$ ]; this remained statistically significant after correction for  
78 multiple significance testing.

79

80 **Conclusions**

81 We cannot currently predict risk of depression relapse with sufficient accuracy in a  
82 primary care setting, using routinely recorded measures. Relationship status  
83 warrants further research to explore its role as a prognostic factor for relapse.

84

85 **Clinical implications**

86 Until we can accurately stratify patients according to risk of relapse, a universal  
87 approach to relapse prevention may be most beneficial, either during acute phase  
88 treatment or post-remission. Where possible, this could be guided by the presence  
89 or absence of known prognostic factors (e.g. residual depressive symptoms) and  
90 targeted towards these.

91 **1. BACKGROUND**

92 Depression is the leading cause of disability worldwide(1); the vast majority of  
93 adults seeking treatment for depression are managed in primary care(2). Relapse is  
94 common, with around half of people experiencing a relapse within one year of  
95 reaching remission(3). This high relapse rate contributes to the overall morbidity and  
96 burden associated with depression(4).

97  
98 An ability to predict an individual patient's risk of relapse after an episode of  
99 depression might assist clinicians in targeting relapse prevention interventions  
100 toward those at greatest risk. Well-established prognostic factors associated with  
101 increased risk of relapse are: residual depressive symptoms; previous depressive  
102 episodes; childhood maltreatment; comorbid anxiety; neuroticism; younger age of  
103 first onset, and rumination(5). While the presence or absence of these prognostic  
104 factors can help refine estimates of overall prognosis to particular sub-groups, they  
105 do not effectively aid risk-stratification at the individual level. Sub-grouping methods  
106 have been used to predict average risk of relapse for groups of people with different  
107 combinations (or profiles) of prognostic factors(6). However, individualised outcome  
108 prediction is best shaped using multiple prognostic factors in combination, in the  
109 form of multivariable prognostic models(7).

110  
111 A systematic review of prognostic models, undertaken by our group, identified  
112 twelve studies of relapse prediction models(8). The majority were at high overall risk  
113 of bias (the most significant limitations being inadequate sample size, inappropriate  
114 handling of missing data, and calibration or discrimination not reported). The  
115 developed models either demonstrated insufficient predictive performance on  
116 reported validation by the study authors, or they could not be feasibly implemented in  
117 a primary care setting due to the large number and type of included predictors. We  
118 concluded that we currently lack evidence-based tools to assist clinicians with risk  
119 prediction of depressive relapse in any clinical setting, and that new models are  
120 required to give accurate risk predictions in primary care settings.

121  
122 **2. OBJECTIVE**

123 To develop and validate a prognostic model, for use in clinical primary care  
124 settings, to predict risk of relapse in adults with remitted depression(9).

125

### 126 **3. METHODS**

127 The methods align with the PROGNosis RESearch Strategy (PROGRESS)  
128 recommendations(7) and the study is reported according to the Transparent  
129 Reporting of a multivariable prediction model for Individual Prognosis or Diagnosis  
130 (TRIPOD-Cluster) guidance(10). A Patient Advisory Group (PAG) contributed to this  
131 study, including selecting predictors, definition of outcome, target patient population  
132 and clinical application. The study was registered prospectively (ClinicalTrials.gov:  
133 NCT04666662). Further methodological details are available in our protocol  
134 paper(9).

135

#### 136 **3.1. Source of data, participants and setting**

137 We formed the “PREDICTR” dataset from combined individual participant  
138 data (IPD) from UK primary care-based studies(9), identified through a literature  
139 search and a review of the NIHR trials registry. Authors were asked to share data if  
140 studies included adult patients (18 years and over) with depression, measured using  
141 the Patient Health Questionnaire (PHQ-9) at a minimum of three time-points (to  
142 identify depression, remission, relapse/no relapse). We excluded studies in patient  
143 groups with significant psychiatric comorbidity and feasibility studies. The  
144 PREDICTR dataset is derived from all arms (control and intervention) of six RCTs of  
145 primary care-based interventions for depression (CADET, CASPER Plus, COBRA,  
146 Healthlines Depression, REEACT, and REEACT-2) and one observational cohort  
147 study (WYLOW) (Supplemental Table 1.1, Figure 1.1).

148

#### 149 **3.2. Start-point (remission)**

150 Participants were in remission at the point of prediction. Participants must  
151 have had case-level depression at baseline [PHQ-9 score of 10 or more(11)], and (at  
152 4 months after trial baseline): i) a post-treatment PHQ-9 score below the established  
153 cut-off of 10 [consistent with clinical recovery(3,12)] and ii) an improvement of  $\geq 5$   
154 points on the PHQ-9 since depression diagnosis [which aligns with an established  
155 reliable change index to identify those with “reliable improvement”(13)].

156

### 157 **3.3. End-point/outcome (relapse)**

158 We coded participants as relapsed if they fulfilled the following criteria within  
159 6-8 months post-remission: i) PHQ-9 score above the diagnostic cut-off (10 or more)  
160 and ii)  $\geq 5$  points greater than their symptom score at the time of remission. This is  
161 also consistent with an established criteria for reliable and clinically significant  
162 deterioration(13).

163

### 164 **3.4. Predictors**

165 We identified predictors *a priori*, following a literature review and consensus  
166 within the multidisciplinary research team and the PAG. We included predictors that  
167 would currently be routinely available in primary care settings at the intended  
168 moment of prediction.

169

#### 170 3.4.1. Predictors in primary analysis

171 The following variables have robust evidence for their role as relapse  
172 predictors(5,14) and were included in the model:

- 173 • Residual depressive symptoms (PHQ-9 score at remission (0-9); continuous  
174 variable);
- 175 • Previous episodes of depression (dichotomous predictor (0=no previous  
176 episodes, 1=one or more previous episodes);
- 177 • Comorbid anxiety (measured using the GAD-7(15) in six of the seven studies  
178 and the Clinic Interview Schedule-Revised (CIS-R)(16) in REEACT (see  
179 Supplemental Table 1.2). These measures were combined to create a  
180 composite score (z-score), modelled as a continuous predictor;
- 181 • Baseline severity of depressive symptoms (continuous predictor; PHQ-9 score  
182 at baseline (pre-treatment));
- 183 • RCT Intervention: to control for the presence of interventions within the RCTs,  
184 we coded the presence or absence of an effective intervention (based on the  
185 results of the RCT) as a dichotomous variable. This predictor was intended to  
186 control for the intervention as part of the model building process only; when  
187 making predictions in real-world primary care this predictor would always be  
188 set to zero (i.e., no experimental intervention present).

189

#### 190 3.4.2. Exploratory predictors

191 These are less well-evidenced predictors of relapse and were included as part  
192 of an exploratory secondary analysis: age; gender; ethnicity; relationship status;  
193 multimorbidity (two or more long-term physical or mental health conditions, excluding  
194 depression and comorbid anxiety); employment status (unemployment being those  
195 of working age who do not have a job and are actively seeking one); and current  
196 antidepressant use(5,14,17).

197

### 198 **3.5. Sample size**

199 We used the *pmsampsize* package (18) to calculate the required minimum  
200 sample size of 722, with 145 events (see protocol for details(9)); our actual sample  
201 size (n=1244; 261 events) exceeded this.

202

### 203 **3.6. Statistical analysis methods**

204

#### 205 3.6.1. Data pre-processing

206 Anonymised data were transferred and stored securely and harmonised in  
207 line with the pre-specified harmonisation procedure (Supplemental Table 1.3).

208

#### 209 3.6.2. Data integrity checks (risk of bias)

210 Data were summarised and checked against publications for key features  
211 such as number of participants (total and in each study arm), demographics, primary  
212 outcomes of study, relapse rates and missing data. Validity of data values were  
213 checked on data inspection and irregularities clarified through communication with  
214 the original authors. Risk of bias assessment was undertaken using the participants,  
215 predictors and outcome domains of PROBAST(19).

216

#### 217 3.6.3. Missing data

218 Missing data were handled using multiple imputation with chained equations  
219 (MICE), under a missing at random assumption(20). Missing values were imputed  
220 based on the values of other predictors and the outcome, using linear models for  
221 continuous predictors (residual symptoms, severity, comorbid anxiety) and logistic



222 models for binary predictors [number of previous episodes, RCT Intervention,  
223 outcome (relapse/no relapse)]. Imputation was undertaken for each study separately,  
224 preserving the clustering of participants within studies and any between-study  
225 heterogeneity in predictor effects and outcome prevalence. Each imputed dataset  
226 was then analysed separately using the same statistical methods, and the estimates  
227 were combined using Rubin's rules, to produce an overall estimate and measure of  
228 uncertainty of each regression coefficient and model performance measures(10). We  
229 used thirty imputations, based on the maximum percentage of participants with one  
230 or more missing values across all individual studies(20).

231

#### 232 3.6.4. Model development (primary analysis)

233 Multilevel multivariable logistic regression models were built to model the  
234 relationship of the predictors with the binary outcome (relapse/no relapse), forcing in  
235 all predictors. Model parameters were estimated via unpenalized maximum  
236 likelihood estimation, and then penalised post-estimation using a uniform shrinkage  
237 factor. The modelling preserved the clustering of participants within studies, with a  
238 random effect on the intercept, a random intervention effect, and allowing for  
239 between-study correlation in these effects. We explored non-linear relationships in  
240 the continuous variables using multivariable fractional polynomials (MFPs)(7).  
241 Predictive performance statistics (C-statistic for discrimination; calibration slope and  
242 calibration-in-the-large) were calculated for the final developed model, first within  
243 each cluster in turn and then pooled using random effects meta-analysis to  
244 summarise the model's performance across clusters with estimates of the pooled  
245 average and 95% confidence intervals. Prediction intervals were constructed to  
246 estimate the model's likely performance in new but similar settings(10). Calibration  
247 was also assessed visually by producing calibration plots with smooth calibration  
248 curves.

249

#### 250 3.6.5. Model validation

251 The optimism of the developed model was measured using non-parametric  
252 bootstrapping. One hundred bootstrap samples (each stratified by study) were  
253 produced from the original dataset. Within each bootstrap sample, the same  
254 modelling procedures were used as for model development. The model estimated

255 using each bootstrap sample was then applied in both the same bootstrap sample  
256 ('apparent performance') and in the original (imputed) dataset ('test performance').  
257 Each time, average performance measures were calculated by pooling within-study  
258 statistics using meta-analysis, as above.

259

260 Optimism was calculated as the difference between apparent and test  
261 performance; this process was repeated one hundred times and the average  
262 difference between the bootstrap (apparent) and test performance for each  
263 performance statistic provided the estimate of overall optimism for that statistic.  
264 Optimism-adjusted performance statistics (C-statistic, calibration slope and  
265 calibration-in-the-large) were subsequently derived. The uniform shrinkage factor (in  
266 this study, the optimism-adjusted calibration slope) was applied to all of the original  
267 estimated beta coefficients (to shrink them toward zero to address overfitting) to  
268 produce a penalised logistic regression model. Finally, the intercept was re-  
269 estimated (whilst constraining the penalised predictor effects at their shrunken value)  
270 to ensure overall calibration was maintained. This formed the final model.  
271 Generalisability of the model and between-study heterogeneity in model  
272 performance was assessed using internal-external cross-validation (IECV)(21) (see  
273 Supplemental Materials 4 for procedure).

274

### 275 3.6.6. Sensitivity analysis

276 To understand the impact of including a composite measure of comorbid  
277 anxiety calculated from both GAD-7 and CIS-R, a sensitivity analysis was performed  
278 measuring predictive performance statistics when omitting REEACT and using only  
279 GAD-7 as the measure of comorbid anxiety, rather than a z-score.

280

### 281 3.6.7. Secondary (exploratory) analyses

282 Univariable analyses were performed to evaluate the unadjusted association  
283 between each predictor variable and the outcome variable. Where univariable  
284 analysis found statistically significant associations (after accounting for multiple  
285 significance testing), the model was refit using all of the original included predictors  
286 plus the additional exploratory predictor, to explore the impact on model predictive  
287 performance (using only studies in which the exploratory predictor was available).

288

289       **3.7.       Ethics approval**

290           The University of York's Health Sciences Research Governance Committee  
291 confirmed that this study was exempt from full ethical approval as it entailed the  
292 secondary analysis of anonymised data from studies that had already received  
293 ethical approval.

294

295       **4. RESULTS**

296       **4.1.       Summary of data**

297           Table 1 presents the descriptive statistics for the IPD. Supplemental Table 2.1  
298 summarises the missing data. Risk of bias and concerns around applicability were  
299 low (Supplemental Table 2.4).

300

301           [Table 1]

**Table 1:** Descriptive statistics for IPD

| Variable                                                    | Study           |                 |                 |                                      |                                                    |                 |                 |                               |
|-------------------------------------------------------------|-----------------|-----------------|-----------------|--------------------------------------|----------------------------------------------------|-----------------|-----------------|-------------------------------|
|                                                             | CADET           | CASPER Plus     | COBRA           | Healthlines Depression               | REEACT                                             | REEACT-2        | WYLOW           | Combined PREDICTR IPD dataset |
| Total number included in analysis (remission)               | 158             | 101             | 169             | 110                                  | 221                                                | 159             | 326             | 1244                          |
| Number relapsed at 6-8 months (%)                           | 32<br>(20)      | 28<br>(27.7)    | 19<br>(11.2)    | 24<br>(21.8)                         | 34<br>(15.4)                                       | 17<br>(10.7)    | 107<br>(32.8)   | 261<br>(21)                   |
| Number with one or more previous episodes of depression (%) | 112<br>(70.8)   | 82<br>(81.9)    | 104<br>(61.5)   | 89<br>(80.9)                         | 154<br>(69.7)                                      | 159<br>(100)    | 124<br>(38)     | 824<br>(66.2)                 |
| Mean PHQ-9 at baseline (SD)                                 | 17.35<br>(4.20) | 15.33<br>(3.39) | 17.27<br>(4.05) | 16<br>(3.70)                         | 15.96<br>(3.92)                                    | 15.77<br>(3.54) | 15.67<br>(4.17) | 16.17<br>(3.98)               |
| Mean PHQ-9 at remission (SD)                                | 4.70<br>(2.69)  | 5.19<br>(2.50)  | 4.08<br>(2.56)  | 5.97<br>(2.30)                       | 4.50<br>(2.61)                                     | 4.53<br>(2.62)  | 3.52<br>(2.31)  | 4.40<br>(2.60)                |
| Mean GAD-7 (SD)                                             | 12.52<br>(4.83) | 8.25<br>(4.85)  | 12.41<br>(4.96) | 11.80<br>(4.44)                      | GAD-7 not used in REEACT (CIS-R anxiety measure**) | 12.97<br>(4.44) | 13.62<br>(4.63) | 12.43<br>(4.92)               |
| Mean age (SD)                                               | 43.2 (12.9)     | 71.8<br>(5.16)  | 45.3<br>(13.9)  | Not applicable (age is categorical*) | 40.3<br>(13.1)                                     | 43.3<br>(14.7)  | 41.7<br>(13.8)  | 45.1<br>(15.63)               |

|                                                                                          |               |                  |               |                  |               |                  |                  |                |
|------------------------------------------------------------------------------------------|---------------|------------------|---------------|------------------|---------------|------------------|------------------|----------------|
| Gender:<br>Number<br>Female (%)                                                          | 113<br>(71.5) | 65<br>(64.3)     | 100<br>(59.2) | 80<br>(72.7)     | 148<br>(67)   | 102<br>(64.2)    | 190<br>(58.3)    | 798<br>(64.1)  |
| Ethnicity*:<br>Number White<br>(%)                                                       | 137<br>(86.7) | 100<br>(99)      | 165<br>(97.6) | 107<br>(97.2)    | 216<br>(97.7) | 154<br>(97.5)    | 292<br>(94.2)    | 1171<br>(95.4) |
| Employment*:<br>Number<br>Employed (%)                                                   | 133<br>(82.8) | Not<br>collected | 132<br>(78.1) | 105<br>(95.4)    | 213<br>(96.3) | 149<br>(93.7)    | 214<br>(65.6)    | 946<br>(82.9)  |
| Relationship<br>status*:<br>Number In a<br>relationship (%)                              | 69<br>(43.7)  | Not<br>collected | 106<br>(62.7) | Not<br>collected | 140<br>(75.7) | 93<br>(58.9)     | Not<br>collected | 408<br>(60.9)  |
| Multimorbidity*:<br>Number with<br>multimorbidity<br>(%)                                 | 88<br>(55.7)  | 86<br>(85.1)     | 96<br>(56.8)  | Not<br>collected | Not collected | Not<br>collected | 87<br>(29.7)     | 357<br>(49.5)  |
| Current<br>antidepressant<br>use: Number<br>on<br>antidepressants<br>at remission<br>(%) | 113<br>(71.5) | 34<br>(41)       | 128<br>(75.7) | 98<br>(90.7)     | Not collected | 55<br>(41.4)     | 130<br>(40.2)    | 558<br>(57.3)  |

303 \*See Supplemental Table 2.2 for further detail on categorical predictors

304 \*\*See Supplemental Table 2.3 for summary statistics for CIS-R anxiety subscale in REEACT

305        **4.2.        Univariable analysis**

306            Table 2 presents the results from univariable multilevel models. Residual  
307 symptoms [OR: 1.13 (1.07-1.20)] and severity [OR: 1.07 (1.04-1.11)] were  
308 statistically significantly associated with relapse; number of previous episodes and  
309 comorbid anxiety were not.

310

311            [Table 2]

**Table 2:** Univariable and multivariable associations between outcome and predictors (primary and secondary analysis)

| Predictor                                | Univariable analysis*          |         |                            | Primary analysis**<br>(multivariable)<br>Seven studies (n=1244) |         | Secondary analysis**<br>(multivariable)<br>Four studies (n=707)**** |         |
|------------------------------------------|--------------------------------|---------|----------------------------|-----------------------------------------------------------------|---------|---------------------------------------------------------------------|---------|
|                                          | Unadjusted odds ratio (95% CI) | p-value | Number of participants (N) | Regression beta coefficient (95% CI)***                         | p-value | Regression beta coefficient (95% CI)                                | p-value |
| <b>Predictors in primary analysis</b>    |                                |         |                            |                                                                 |         |                                                                     |         |
| Number of previous episodes              | 1.19<br>(0.84 to 1.72)         | 0.319   | 1117                       | 0.13<br>(-0.24 to 0.50)                                         | 0.500   | -0.15<br>(-0.66 to 0.37)                                            | 0.582   |
| Residual symptoms                        | 1.13<br>(1.07 to 1.20)         | <0.001  | 1244                       | -2.11<br>(-3.07 to -1.14)                                       | <0.001  | 0.07<br>(-0.01 to 0.15)                                             | 0.081   |
| Baseline severity of depressive symptoms | 1.07<br>(1.04 to 1.11)         | <0.001  | 1244                       | 0.09<br>(0.04 to 0.13)                                          | <0.001  | 0.07<br>(0.01 to 0.13)                                              | 0.020   |
| Comorbid anxiety (z-score)               | 1.04<br>(0.90 to 1.20)         | 0.589   | 1239                       | -0.13<br>(-0.30 to 0.03)                                        | 0.936   | -0.12<br>(-0.37 to 0.14)                                            | 0.363   |
| RCT intervention                         | 0.99<br>(0.60 to 1.66)         | 0.981   | 1244                       | 0.03<br>(-0.59 to 0.65)                                         | 0.936   | -0.40<br>(-0.84 to 0.04)                                            | 0.076   |
| <b>Predictors in secondary analysis</b>  |                                |         |                            |                                                                 |         |                                                                     |         |
| Relationship status (in a relationship)  | 0.43<br>(0.28 to 0.67)         | <0.001  | 670                        |                                                                 |         | -0.79<br>(-1.23 to -0.34)                                           | 0.001   |
| Comorbid anxiety (GAD-7)                 | 1.00<br>(0.97 to 1.03)         | 0.943   | 1019                       |                                                                 |         |                                                                     |         |
| Gender (female)                          | 0.87<br>(0.62 to 1.10)         | 0.196   | 1244                       |                                                                 |         |                                                                     |         |
| Ethnicity (white)                        | 1.59                           | 0.138   | 1227                       |                                                                 |         |                                                                     |         |

|                                   |       |                        |       |      |  |
|-----------------------------------|-------|------------------------|-------|------|--|
|                                   |       | (0.86 to 2.93)         |       |      |  |
| Age (continuous)                  |       | 1.01<br>(1.00 to 1.02) | 0.198 | 1133 |  |
| Age – categorical (years old)     | <40   | Reference category     |       | 1243 |  |
|                                   | 40-49 | 1.16<br>(0.80 to 1.68) | 0.433 |      |  |
|                                   | 50-59 | 1.31<br>(0.88 to 1.95) | 0.180 |      |  |
|                                   | 60-69 | 0.85<br>(0.51 to 1.43) | 0.543 |      |  |
|                                   | 70+   | 1.93<br>(1.04 to 3.59) | 0.037 |      |  |
| Employment (employed)             |       | 0.76<br>(0.52 to 1.11) | 0.161 | 1141 |  |
| Multimorbidity                    |       | 1.31<br>(0.90 to 1.90) | 0.158 | 721  |  |
| Current antidepressant medication |       | 0.97<br>(0.70 to 1.35) | 0.853 | 974  |  |

313 \* Univariable associations (unadjusted) between predictors and relapse within 6-8 months, after accounting for clustering by study

314 \*\*Beta coefficients before shrinkage (predictors adjusted for other variables in column)

315 \*\*\* Intercept (baseline risk): -1.55 (95% CI: -2.12 to -1.00); Standard deviation of random effect on intercept: 0.43 (95% CI: 0.14 to 1.38); Standard  
316 deviation of random effect on slope (RCT Intervention): 0.49 (95% CI: 0.11 to 2.16); Correlation between random effects: -0.23 (-0.93 to 0.84)

317 \*\*\*\*Secondary analysis included only studies with relationship status available (n=707)



318        **4.3.        Model development and apparent predictive performance**

319        Table 2 presents the results of multivariable, multilevel logistic regression  
320        analysis for the primary analysis. The developed model, prior to shrinkage, had a  
321        pooled apparent performance of: C-statistic 0.62 (95% CI: 0.57-0.67), calibration  
322        slope of 0.95 (95% CI: 0.54-1.36), and calibration-in-the-large of 0.03 (95% CI: -0.49-  
323        0.54). See Supplemental Materials 3 for within-study performance statistics  
324

325        **4.4.        Internal validation, shrinkage and final equation**

326        Optimism-adjusted performance statistics, after bootstrapping, were: C-statistic  
327        0.60, calibration slope 0.81, and calibration-in-the-large 0.03. The final model (Table  
328        3) was produced by multiplying the original beta regression coefficients (from Table  
329        2) by 0.81 (the optimism-adjusted calibration slope), and re-estimating the intercept  
330        to ensure calibration-in-the-large.

331

332        [Table 3]

**Table 3:** Summary of model's predictive performance for primary, sensitivity and secondary analyses

| Measure of predictive performance*          | Primary analysis                   |                                                     |                                    | Secondary analysis (exploring relationship status as a predictor) |                          |
|---------------------------------------------|------------------------------------|-----------------------------------------------------|------------------------------------|-------------------------------------------------------------------|--------------------------|
|                                             | Development (apparent performance) | Internal validation (optimism-adjusted performance) | Internal-external cross validation | Without relationship status                                       | With relationship status |
|                                             |                                    |                                                     |                                    | Apparent performance                                              | Apparent performance     |
| Number of participants (number of clusters) | 1244<br>(7)                        | 1244<br>(7)                                         | 1244<br>(7)                        | 707<br>(4)                                                        | 707<br>(4)               |
| C-statistic (95% CI*)                       | 0.62<br>(0.57 to 0.67)             | 0.60                                                | 0.60<br>(0.55 to 0.65)             | 0.60<br>(0.54 to 0.66)                                            | 0.63<br>(0.57 to 0.70)   |
| Calibration slope (95% CI*)                 | 0.95<br>(0.53 to 1.36)             | 0.81                                                | 0.81<br>(0.31 to 1.31)             | 0.94<br>(0.37 to 1.51)                                            | 0.96<br>(0.56 to 1.36)   |
| Calibration-in-the-large (95% CI*)          | 0.03<br>(-0.49 to 0.54)            | 0.03                                                | 0.00<br>(-0.61 to 0.61)            | 0.01<br>(-0.25 to 0.27)                                           | 0.01<br>(-0.20 to 0.23)  |

334 \*Pooled predictive performance across studies (within-study performance statistics all available in Supplemental Materials); 95% CI presented,  
 335 where applicable (not for optimism-adjusted statistics)

336 Final shrunken model: Intercept (baseline risk): -1.49; Shrunken beta coefficients: Number of previous episodes: 0.11, Residual symptoms: -  
337 1.71; Severity: 0.07; Comorbid anxiety: -0.11; RCT Intervention: 0.02  
338 To calculate the risk of relapse within 6-8 months, using this model, one would use the following formula:  $\exp(\text{person's risk score}) \div [1 +$   
339  $\exp(\text{person's risk score})]$   
340 Where person's risk score (linear predictor) =  $-1.49 + 0.11 (\text{Number of previous episodes}^1) - 1.71 (\text{Residual symptoms}^2) + 0.07 (\text{Severity}^3) -$   
341  $0.11 (\text{comorbid anxiety}^4) + 0.02 (\text{RCT Intervention}^5)$

---

<sup>1</sup> No previous episodes = 0; One or more previous episodes = 1

<sup>2</sup>  $X^{\wedge} -0.5 - 0.43$  (where  $X = (\text{residual\_symptoms}+1)$ ) – this is the adjustment for non-linear transformation and mean-centring

<sup>3</sup> Severity – 16.17

<sup>4</sup> Comorbid\_anx\_zscore + 0.118

<sup>5</sup> This would be zero when applied in clinical practice, outside the context of an RCT

342        **4.5.        Internal-external cross-validation**

343            Generalisability of the model was assessed using IECV(21). Calibration plots  
344 were compared for each validation in each of the different studies (Figure 1). These  
345 demonstrate inadequate calibration in most studies and significant heterogeneity in  
346 predictive performance across clusters. For example, WYLOW study shows severe  
347 miscalibration, with estimated risks generally too low, whereas in the COBRA study  
348 estimated risks are generally too high. In some studies, calibration was generally  
349 excellent (e.g., Healthlines Depression)

350

351 [Figure 1: Calibration plots for internal-external cross-validation within each study]

352        **4.6.        Sensitivity analysis**

353        We removed REEACT and repeated the modelling process on the remaining six  
354        studies, to assess the impact of using z-scores to model comorbid anxiety. This did  
355        not change the study conclusions (see Supplemental Material 5 for analysis).

356

357        **4.7.        Secondary analysis**

358        On univariable multilevel logistic analysis, relationship status was a highly  
359        statistically significant predictor (after adjusting the significance level to account for  
360        multiple significance testing using the Bonferroni correction). To further explore  
361        relationship status as a predictor of relapse, we repeated the model development  
362        procedures used in the primary analysis for the studies that included relationship  
363        status (CADET, COBRA, REEACT, and REEACT-2). We conducted these analyses  
364        both with and without the relationship status variable to provide a direct comparison  
365        (see Supplemental Material 6). Relationship status remained a statistically significant  
366        relapse predictor after adjusting for other prognostic factors (previous episodes,  
367        residual symptoms, severity, and comorbid anxiety).

368

369        **5. DISCUSSION**

370        We developed a model for predicting depression relapse in adults with remitted  
371        depression in primary care. Generally, the model had suboptimal predictive  
372        performance, with heterogeneous calibration across clusters on IECV and C-statistic  
373        below that required for acceptable discrimination. We would not recommend  
374        implementation in its current form, though calibration was promising in a subset of  
375        studies. Secondary analysis found a statistically significant association between  
376        relationship status and relapse.

377

378        **5.1. Findings in the context of the literature**

379        The performance of this model was in line with the performance measures for  
380        previous relapse prediction models(8). Residual symptoms were associated with  
381        relapse, which is consistent with existing literature(5,14). Residual symptoms are  
382        also associated with a more chronic depression course and poorer psychosocial  
383        functioning(22) and, as such, are an established treatment target in depression. The

384 pre-existing evidence for severity as a prognostic factor for relapse is more equivocal  
385 than for residual symptoms(5). Residual symptoms are more likely in people with  
386 more severe initial depressive illness(23) and so the presence of residual symptoms  
387 may be a mediator of the relationship between baseline severity and relapse.

388

389 The lack of association between previous episodes and relapse in our study is  
390 not consistent with the consensus view(5,14). It is possible that this is because it was  
391 limited to a binary variable (“no previous episodes” or “one or more previous  
392 episodes”) in our study. However, the prognostic effect of previous episodes on  
393 relapse is known to be strongest when comparing any number of previous episodes  
394 to no previous episodes rather than being related to a specific number of previous  
395 episodes(5). An alternative explanation may be that previous episodes is most  
396 strongly associated with recurrence (which occurs over a longer time period than  
397 relapse) and therefore our 6-8 month follow-up was not sufficient to detect this  
398 association(5). Comorbid anxiety is recognised as a predictor of relapse(5); in  
399 particular, higher levels of anxiety at baseline have been found to predict a shorter  
400 time to relapse after treatment(24). In this study, we used anxiety at baseline (when  
401 depressed), using GAD-7 and the CIS-R anxiety subscale as measures of comorbid  
402 anxiety. It may be that an isolated measure of anxiety symptom severity at a single  
403 time-point is a crude measure and less important than knowing an individual’s history  
404 of comorbid anxiety.

405

406 Marital status (being single) is a risk factor for developing depression(17). A  
407 recent study also identified marital status (being single or no longer married) as  
408 being associated with a worse prognosis (more depressive symptoms) at 3-4 months  
409 (but not beyond 3-4 months)(25). While marital status is not an established predictor  
410 of relapse(5,17), our systematic review of prognostic models identified low-quality  
411 evidence of an association between relapse and marital status(8). The lack of  
412 association between relapse and other exploratory predictors (age, gender, ethnicity,  
413 employment status and multimorbidity) is consistent with other findings from the  
414 literature(5,14).

415

416 The prognostic factor research cited here is based on longitudinal studies,  
417 which examine the predictive value of specific variables based on sample-level

418 trends. As our systematic review (8) and the current study demonstrate, combining  
419 these well-evidenced relapse predictors to produce individualised predictions of  
420 relapse risk remains challenging and calibration remains suboptimal for the purpose  
421 of personalised decision-making(7).

422

## 423 **5.2. Strengths and limitations**

424 This study was conducted according to best practice recommendations for  
425 methodology and reporting, with a sufficient sample size to produce precise risk  
426 estimates(26). By pre-selecting predictors with a robust, pre-existing evidence base,  
427 we aimed to mitigate the risk of overfitting and additional uncertainty associated with  
428 more data-driven approaches for predictor selection. While cohort studies and RCTs  
429 are recommended sources of data for prognostic model development(7), participants  
430 may differ from the general population in important ways and results should be  
431 interpreted with this in mind. For example, the majority of participants in this study  
432 were white, which limited our ability to explore ethnicity as a predictor. Some  
433 potentially useful predictors were not included (e.g., neuroticism, childhood  
434 maltreatment and rumination(5)) as they were not coded for in our cohorts (these are  
435 also not routinely measured in general practice settings). There was a risk of  
436 selection bias given the way studies were selected for inclusion. There was  
437 heterogeneity in IPD study populations (e.g., CASPER Plus included older adults),  
438 settings and treatment dose. WYLOW followed-up patients after low-intensity CBT  
439 whereas interventions in other studies (like COBRA) were more intensive and  
440 delivered over a greater number of sessions. While interventions were controlled for  
441 in the analysis, this heterogeneity could explain some of the observed miscalibration.  
442 Finally, outcomes (remission and relapse) were defined according to PHQ-9 (which  
443 is less optimal than diagnostic interview) and over a time-period (6-8 months)  
444 necessitated by the IPD data collection points [although one that is aligned with  
445 established definitions of relapse(5)].

446

## 447 **5.3. Implications for future research**

448 The strong statistically significant association between relationship status and  
449 relapse in our study warrants further confirmatory prognostic factor research going  
450 forwards, to better understand the association between marital/relationship and  
451 relapse and how this relates to its better understood association with depression

452 more generally. Further research is needed to better understand whether other  
453 relapse predictors can be captured and recorded in an acceptable and valid way by  
454 primary care health professionals. For example, we know that routinely asking  
455 people about childhood maltreatment is not harmful(27), therefore it may be feasible  
456 to explore the use of childhood maltreatment and adversity as part of routine relapse  
457 risk assessment in primary care. There have been some efforts to develop clinically  
458 useful and valid brief instruments to measure rumination(28), which could be  
459 explored in a primary care setting. If there were robust evidence supporting the  
460 clinical utility of measuring and documenting additional relapse predictors, health  
461 professionals might then adopt this as routine practice. Better data linkage and  
462 systems integration across health and wellbeing services may also help address this  
463 problem.

464

465 In this study, we modelled the outcome of relapse as a binary outcome, which  
466 enabled us to incorporate criteria for reliable and significant change to define the  
467 outcome. It would be informative as part of future work to model the outcome on its  
468 continuous scale (i.e., build a linear model that estimates the outcome value, rather  
469 than the probability of a binary outcome), with dichotomisation done post-prediction.  
470 We focused on outcome occurrence by 6-8 months, but other time-points may be of  
471 interest.

472

473 As the IECV in this study demonstrated, there was heterogeneity in the  
474 external performance and generalisability of the model was not guaranteed. The  
475 studies from which IPD were drawn were generally comparable in terms of baseline  
476 demographic variables such as age, gender and ethnicity. Our IECV used the mean  
477 intercept and predictor-outcome associations to estimate performance. An  
478 alternative approach that could be considered in future work is local recalibration or  
479 intercept selection, where similarities in the outcome frequency or baseline  
480 characteristics (for example, mean age or proportion female) of a new population of  
481 interest is used to guide the intercept when applying the model in a different  
482 context(29). If the predictive performance of relapse prediction models can be  
483 improved in the future through recalibration or updating, clinical usefulness (using  
484 net benefit analysis) must be considered prior to implementation.

485



## 486 **6. CLINICAL IMPLICATIONS**

487 We cannot currently predict an individual's risk of relapse with a high degree of  
488 accuracy, and existing relapse risk prediction models are unlikely to be suitable to  
489 guide the provision of relapse prevention. There are different approaches to  
490 prevention: universal approaches, which target whole populations; selective  
491 approaches, which target higher-risk groups; and indicated approaches, directed at  
492 individuals. In the absence of sufficiently accurate relapse risk prediction tools, we  
493 argue that a universal approach to relapse prevention of depression in primary care  
494 is currently warranted. This is likely to require a systems approach to mitigating the  
495 risk of and improving the management of relapse for all patients. This could mean  
496 targeting treatment at known prognostic factors (for example, focussing on reducing  
497 residual symptoms) or providing interventions as part of treatment during the acute  
498 phase of depression that target mechanisms of relapse (for example, prioritising  
499 relapse prevention planning)(30). Longer term, brief, inexpensive and scalable  
500 relapse prevention interventions are likely to be required for use in primary care.

501

## 502 **FIGURE LEGENDS**

503 Figure 1: Calibration plots for internal-external cross-validation within each study

504

## 505 **ACKNOWLEDGEMENTS**

506 Thank you to the patient advisory group without whose contributions this study would  
507 not have been possible: Joanne Castleton, Penney Mayall, Gillian Payne, Sue Penn,  
508 and Emma Williams.

509

## 510 **COMPETING INTERESTS**

511 None.

512

## 513 **FUNDING**

514 This report is independent research supported by the National Institute for Health  
515 and Care Research (NIHR Doctoral Research Fellowship, Dr Andrew Moriarty, DRF-  
516 2018-11-ST2-044). KIES, RDR and LA are supported by funding from the NIHR  
517 Birmingham Biomedical Research Centre (BRC). RDR, SG, DAR and CS are NIHR  
518 Senior Investigators. The views expressed in this publication are those of the

519 author(s) and not necessarily those of the NHS, the NIHR, or the Department of  
520 Health and Social Care.

521

## 522 **AUTHOR CONTRIBUTIONS**

523 ASM, CCG, SG, SA and DM conceptualised the study and acquired funding. ASM  
524 led on data curation, study administration and oversight, and wrote the original draft.  
525 ASM, LWP, KIES, LA, RDR, JEJB and NM contributed to methodology and data  
526 analysis. SG, JD, DAR and CS were responsible for collecting the data and agreed  
527 to share these for the purpose of this study. All authors contributed to the pre-  
528 registered protocol and study plan and all authors contributed to and approved the  
529 final manuscript.

530

## 531 **REFERENCES**

- 532 1. World Health Organisation. Weekly Epidemiological Report [Internet]. Vol. 30,  
533 World Health Organization. 2017. Available from:  
534 <http://www.who.int/wer/2016/wer9130.pdf?ua=1>
- 535 2. Ferenchick EK, Ramanuj P, Pincus HA. Depression in primary care: part 1-  
536 screening and diagnosis. *BMJ*. 2019;365:l794.
- 537 3. Ali S, Rhodes L, Moreea O, McMillan D, Gilbody S, Leach C, et al. How  
538 durable is the effect of low intensity CBT for depression and anxiety?  
539 Remission and relapse in a longitudinal cohort study. *Behaviour Research and*  
540 *Therapy* [Internet]. 2017;94:1–8. Available from:  
541 <http://dx.doi.org/10.1016/j.brat.2017.04.006>
- 542 4. Gauthier G, Mucha L, Shi S, Guerin A. Economic burden of relapse/recurrence  
543 in patients with major depressive disorder. *J Drug Assess* [Internet].  
544 2019;8(1):97–103. Available from:  
545 <https://doi.org/10.1080/21556660.2019.1612410>
- 546 5. Buckman JEJ, Underwood A, Clarke K, Saunders R, Hollon SD, Fearon P, et  
547 al. Risk factors for relapse and recurrence of depression in adults and how  
548 they operate: A four-phase systematic review and meta-synthesis. *Clin*  
549 *Psychol Rev*. 2018;64(July 2017):13–38.
- 550 6. Saunders R, Cohen ZD, Ambler G, Derubeis RJ, Wiles N, Kessler D, et al. A  
551 Patient Stratification Approach to Identifying the Likelihood of Continued  
552 Chronic Depression and Relapse Following Treatment for Depression. *J Pers*  
553 *Med*. 2021 Dec 1;11(12).
- 554 7. Riley RD, van der Windt D, P C, Moons K. *Prognosis Research in Healthcare:*  
555 *Concepts, Methods, and Impact*. First edit. Oxford University Press.; 2019.
- 556 8. Moriarty AS, Meader N, Snell KIE, Riley RD, Paton LW, Dawson S, et al.  
557 Predicting relapse or recurrence of depression: Systematic review of  
558 prognostic models. *British Journal of Psychiatry*. Cambridge University Press;  
559 2022.
- 560 9. Moriarty AS, Paton LW, Snell KIE, Riley RD, Buckman JEJ, Gilbody S, et al.  
561 The development and validation of a prognostic model to PREDICT Relapse of

- 562 depression in adult patients in primary care: protocol for the PREDICTR study.  
563 *Diagn Progn Res.* 2021 Dec;5(1).
- 564 10. Debray TPA, Collins GS, Riley RD, Snell KIE, Van Calster B, Reitsma JB, et  
565 al. Transparent reporting of multivariable prediction models developed or  
566 validated using clustered data (TRIPOD-Cluster): explanation and elaboration.  
567 *BMJ [Internet].* 2023 Feb 7;e071058. Available from:  
568 <https://www.bmj.com/lookup/doi/10.1136/bmj-2022-071058>
- 569 11. Kroenke K, Spitzer RL, Williams JBW. The PHQ-9: Validity of a brief  
570 depression severity measure. *J Gen Intern Med.* 2001;16(9):606–13.
- 571 12. Clark DM, Layard R, Smithies R, Richards DA, Suckling R, Wright B.  
572 Improving access to psychological therapy: Initial evaluation of two UK  
573 demonstration sites. *Behaviour Research and Therapy.* 2009 Nov;47(11):910–  
574 20.
- 575 13. McMillan D, Gilbody S, Richards D. Defining successful treatment outcome in  
576 depression using the PHQ-9: A comparison of methods. *J Affect Disord*  
577 *[Internet].* 2010;127(1–3):122–9. Available from:  
578 <http://dx.doi.org/10.1016/j.jad.2010.04.030>
- 579 14. Wojnarowski C, Firth N, Finegan M, Delgadillo J. Predictors of depression  
580 relapse and recurrence after cognitive behavioural therapy: a systematic  
581 review and meta-analysis. *Behavioural and Cognitive Psychotherapy [Internet].*  
582 2019 Sep 21 [cited 2020 Mar 22];47(5):514–29. Available from:  
583 [https://www.cambridge.org/core/product/identifier/S1352465819000080/type/jo](https://www.cambridge.org/core/product/identifier/S1352465819000080/type/journal_article)  
584 [urnal\\_article](https://www.cambridge.org/core/product/identifier/S1352465819000080/type/journal_article)
- 585 15. Spitzer RL, Kroenke K, Williams JBW, Löwe B. A brief measure for assessing  
586 generalized anxiety disorder: The GAD-7. *Arch Intern Med.*  
587 2006;166(10):1092–7.
- 588 16. Lewis G, Pelosi AJ, Araya R, Dunn G. Measuring psychiatric disorder in the  
589 community: A standardized assessment for use by lay interviewers. *Psychol*  
590 *Med.* 1992;22(2):465–86.
- 591 17. Burcusa SL, Iacono WG. Risk for recurrence in depression. *Clin Psychol Rev.*  
592 2007;27(8):959–85.
- 593 18. Ensor J. PMSAMPSIZE: Stata module to calculate the minimum sample size  
594 required for developing a multivariable prediction model. *Statistical Software*  
595 *Components S458569, Boston College Department of Economics;* 2018.
- 596 19. Wolff RF, Moons KGM, Riley RD, Whiting PF, Westwood M, Collins GS, et al.  
597 PROBAST: A Tool to Assess the Risk of Bias and Applicability of Prediction  
598 Model Studies. *Ann Intern Med [Internet].* 2019;170(1):51. Available from:  
599 <http://annals.org/article.aspx?doi=10.7326/M18-1376>
- 600 20. White IR, Royston P, Wood AM. Multiple imputation using chained equations:  
601 Issues and guidance for practice. *Stat Med.* 2011;30(4):377–99.
- 602 21. Takada T, Nijman S, Denaxas S, Snell KIE, Uijl A, Nguyen TL, et al. Internal-  
603 external cross-validation helped to evaluate the generalizability of prediction  
604 models in large clustered datasets. *J Clin Epidemiol [Internet].* 2021;137:83–  
605 91. Available from: <https://doi.org/10.1016/j.jclinepi.2021.03.025>
- 606 22. Kennedy N, Foy K. The Impact of Residual Symptoms on Outcome of Major  
607 Depression. *Curr Psychiatry Rep.* 2005;7:441–6.
- 608 23. Paykel E, Ramana R, Cooper Z, Hayhurst H, Kerr J, Barocka A. Residual  
609 symptoms after partial remission: An important outcome in depression.  
610 *Psychol Med.* 1995;25(6):1171–80.

- 611 24. Forand NR, Derubeis RJ. Pretreatment anxiety predicts patterns of change in  
612 cognitive behavioral therapy and medications for depression. *J Consult Clin*  
613 *Psychol.* 2013;81(5):774–82.
- 614 25. Buckman JEJ, Saunders R, Stott J, Arundell LL, O’Driscoll C, Davies MR, et  
615 al. Role of age, gender and marital status in prognosis for adults with  
616 depression: An individual patient data meta-analysis. *Epidemiol Psychiatr Sci.*  
617 2021 Jun 4;30:e42.
- 618 26. Riley RD, Ensor J, Snell KIE, Harrell FE, Martin GP, Reitsma JB, et al.  
619 Calculating the sample size required for developing a clinical prediction model.  
620 *BMJ* [Internet]. 2020 Mar 18;m441. Available from:  
621 <http://www.bmj.com/lookup/doi/10.1136/bmj.m441>
- 622 27. Becker-Blease KA, Freyd JJ. Research participants telling the truth about their  
623 lives: The ethics of asking and not asking about abuse. *American*  
624 *Psychologist.* 2006 Apr;61(3):218–26.
- 625 28. Marchetti I, Mor N, Chiorri C, Koster EHW. The brief state rumination inventory  
626 (BSRI): Validation and psychometric evaluation. *Cognit Ther Res.* 2018 Feb  
627 26;42(4):447–60.
- 628 29. Debray TPA, Moons KGM, Ahmed I, Koffijberg H, Riley RD. A framework for  
629 developing, implementing, and evaluating clinical prediction models in an  
630 individual participant data meta-analysis. *Stat Med.* 2013 Aug 15;32(18):3158–  
631 80.
- 632 30. Bockting CL, Hollon SD, Jarrett RB, Kuyken W, Dobson K. A lifetime approach  
633 to major depressive disorder: The contributions of psychological interventions  
634 in preventing relapse and recurrence. *Clin Psychol Rev* [Internet]. 2015;41:16–  
635 26. Available from: <http://dx.doi.org/10.1016/j.cpr.2015.02.003>  
636

1) CADET

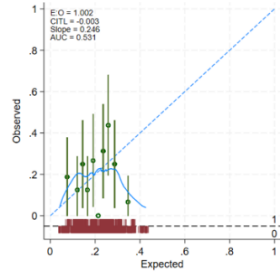

2) CASPER Plus

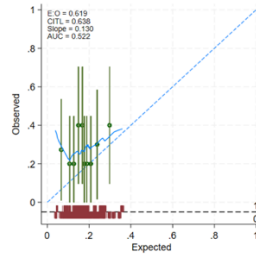

3) COBRA

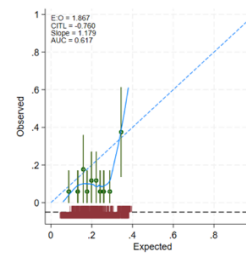

4) Healthlines Depression

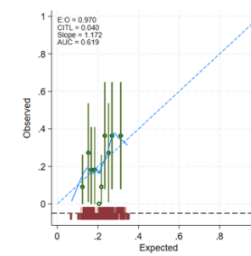

5) REEACT

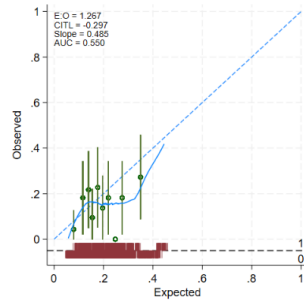

6) REEACT-2

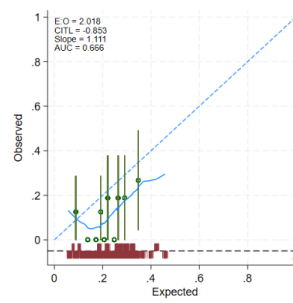

7) WYLOW

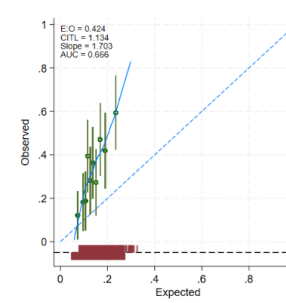

Source: https://medrxiv.org/content/10.1101/2024.06.25.24309402v1.full.pdf
